# Supplementary figures and images for: d-Cycloserine as an Augmentation Strategy With Cognitive-Behavioral Therapy for Social Anxiety Disorder
Source: Atypon-hosted journal article supplement (doi:10.1176/appi.ajp.2013.12070974), 2013-07-01

**FIGURE S1. Flow of Patients From Randomization Through Analysis**

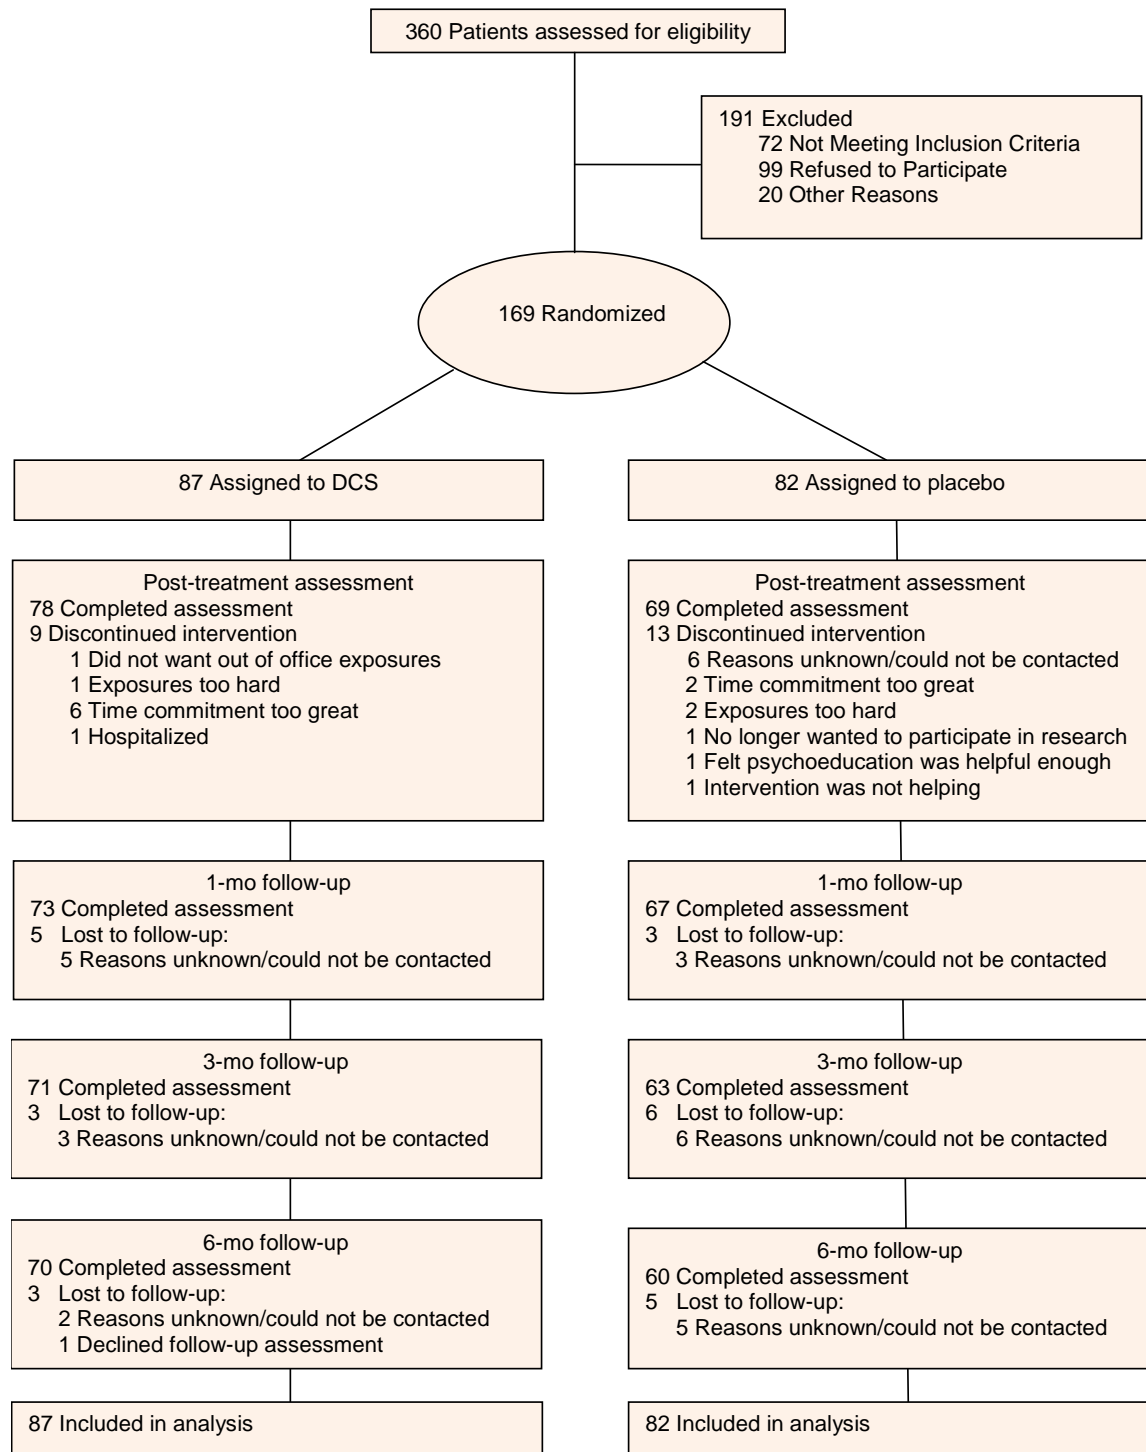

Supplement: 751_ds001.pdf [file 751_ds001.pdf]
